# Supplementary material for: Dynamics of human protein kinase Aurora A linked to drug selectivity
Source: eLife journal article supplement (doi:10.7554/elife.36656), 2018-06-14
Supplement: supp [file elife-36656-supp-v1.zip]

Archive with 7 entries (7 files):
- elife_poa_e36656_Figure_5_figure_supplement_2.ai
- elife_poa_e36656_Transparent_Reporting_File.pdf
- elife_poa_e36656_Figure_6_figure_supplement_1.ai
- elife_poa_e36656_Figure_7_figure_supplement_1.ai
- elife_poa_e36656_Figure_8_figure_supplement_1.ai
- elife_poa_e36656_Figure_5_figure_supplement_1.ai
- elife_poa_e36656_Figure_6_figure_supplement_2.pdf
