# Supplementary figures and images for: Dynamics of human protein kinase Aurora A linked to drug selectivity
Source: eLife journal article supplement (doi:10.7554/elife.36656), 2018-06-14

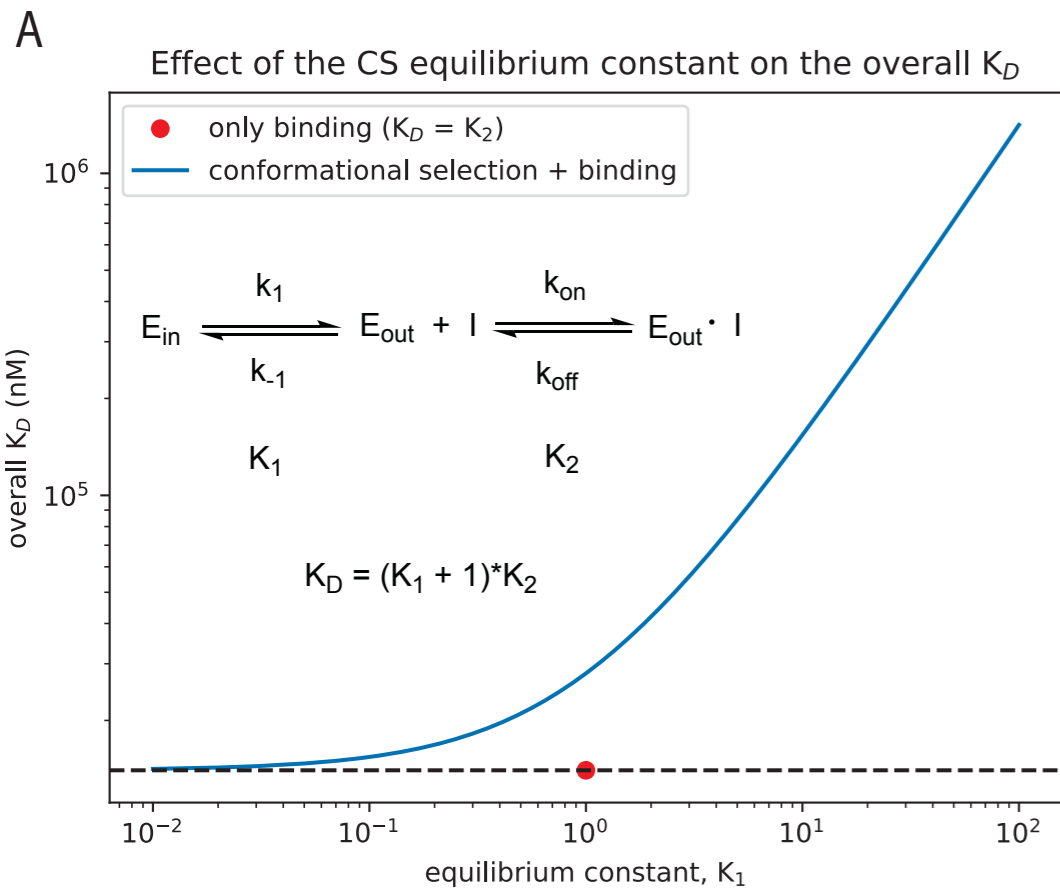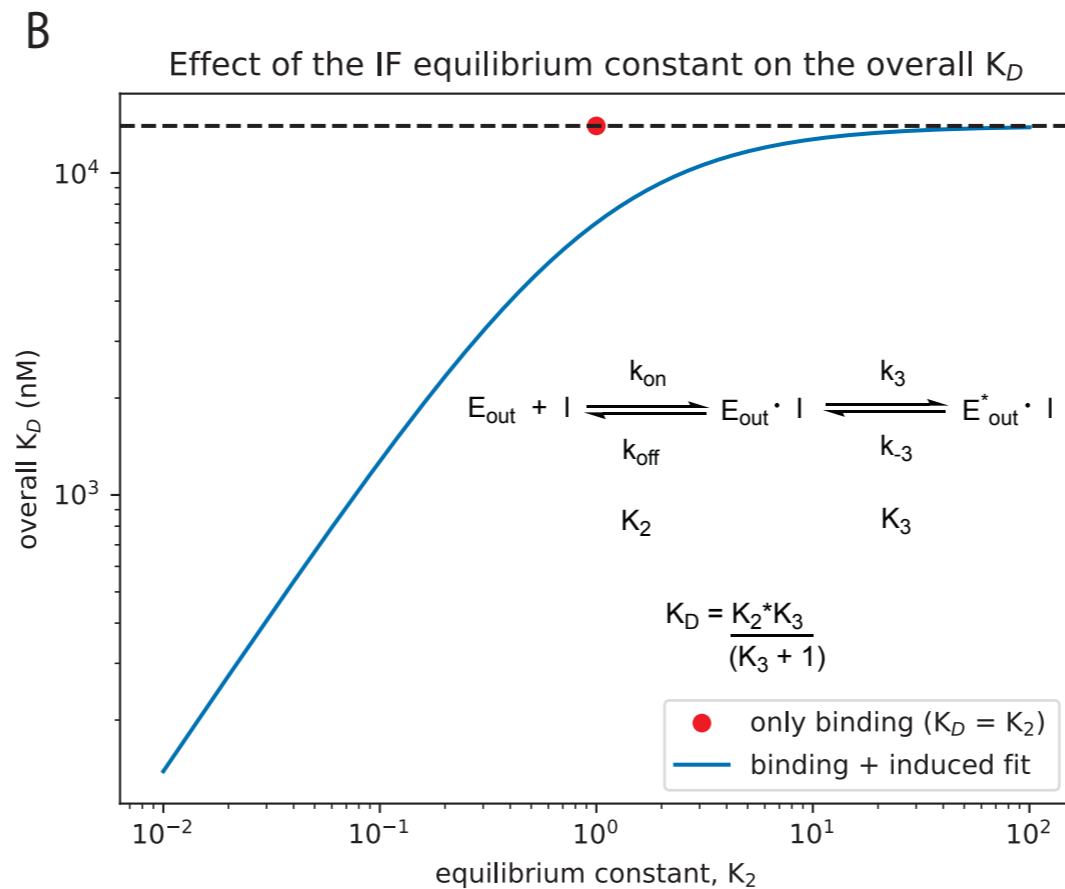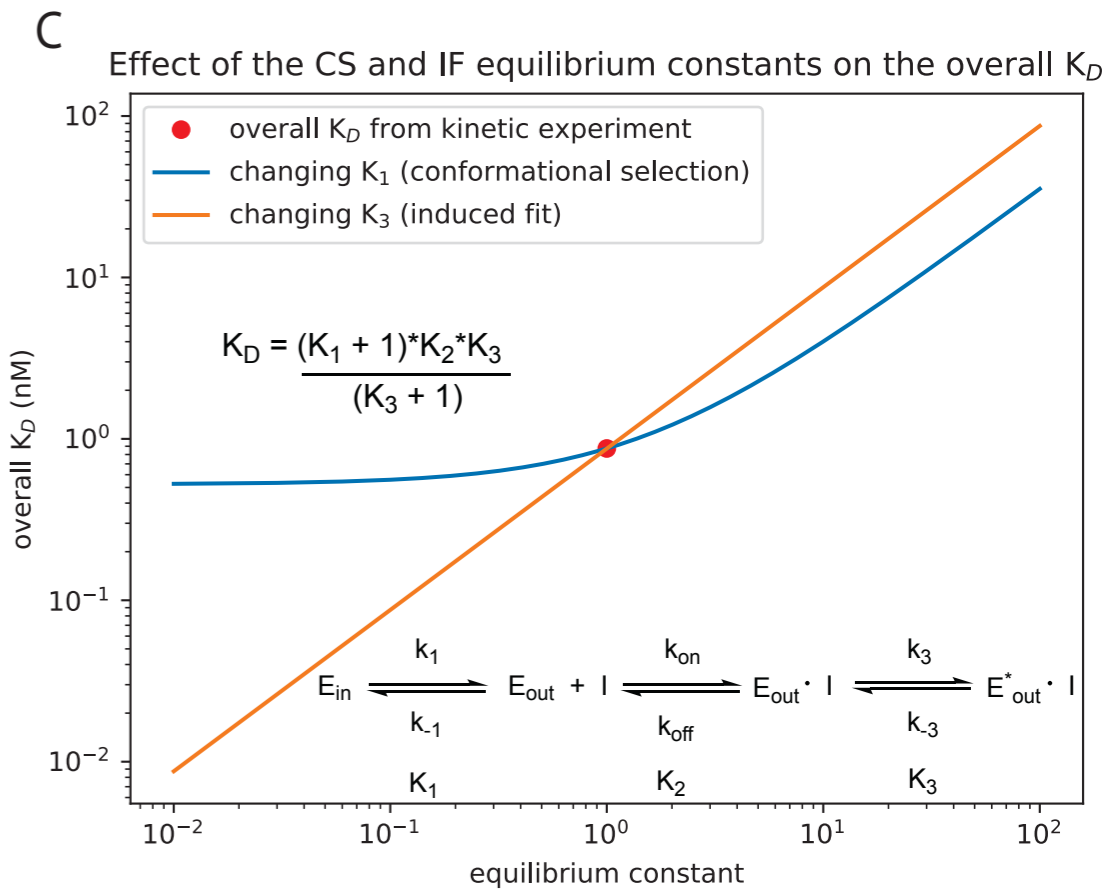

Supplement: supp [file elife-36656-supp-v1.zip › elife_poa_e36656_Figure_6_figure_supplement_2.pdf]
